# Supplementary material for: Biomimetic nonbiofouling polypyrrole electrodes grafted with zwitterionic polymer using gamma rays
Source: Royal Society of Chemistry journal article supplement (doi:10.1039/c9tb02087j), 2020-01-01
Supplement: c9tb02087j1.pdf [file c9tb02087j1.pdf]

## Supporting Information

# Biomimetic nonbiofouling polypyrrole electrodes grafted with zwitterionic polymer using gamma ray

**Jin-Oh Jeong<sup>a,b</sup>, Semin Kim<sup>c</sup>, Junggeon Park<sup>a</sup>, Sanghun Lee<sup>a</sup>, Jong-Seok Park<sup>b</sup>,  
Youn-Mook Lim<sup>b\*</sup>, and Jae Young Lee<sup>a\*</sup>**

<sup>a</sup> School of Materials Science and Engineering, Gwangju Institute of Science and Engineering (GIST), Gwangju 500-712, Republic of Korea Address here.

<sup>b</sup> Research Division for Industry & Environment, Advanced Radiation Technology Institute, Korea Atomic Energy Research Institute (KAERI), 29 Gumgugil, Jeongeup, 56212, Republic of Korea

<sup>c</sup> Department of Biologic and Materials Science, University of Michigan, Ann Arbor, MI 48109, United States

\* [jaeyounglee@gist.ac.kr](mailto:jaeyounglee@gist.ac.kr) (J.Y.L.), [ymlim71@kaeri.re.kr](mailto:ymlim71@kaeri.re.kr) (Y.-M.L.)

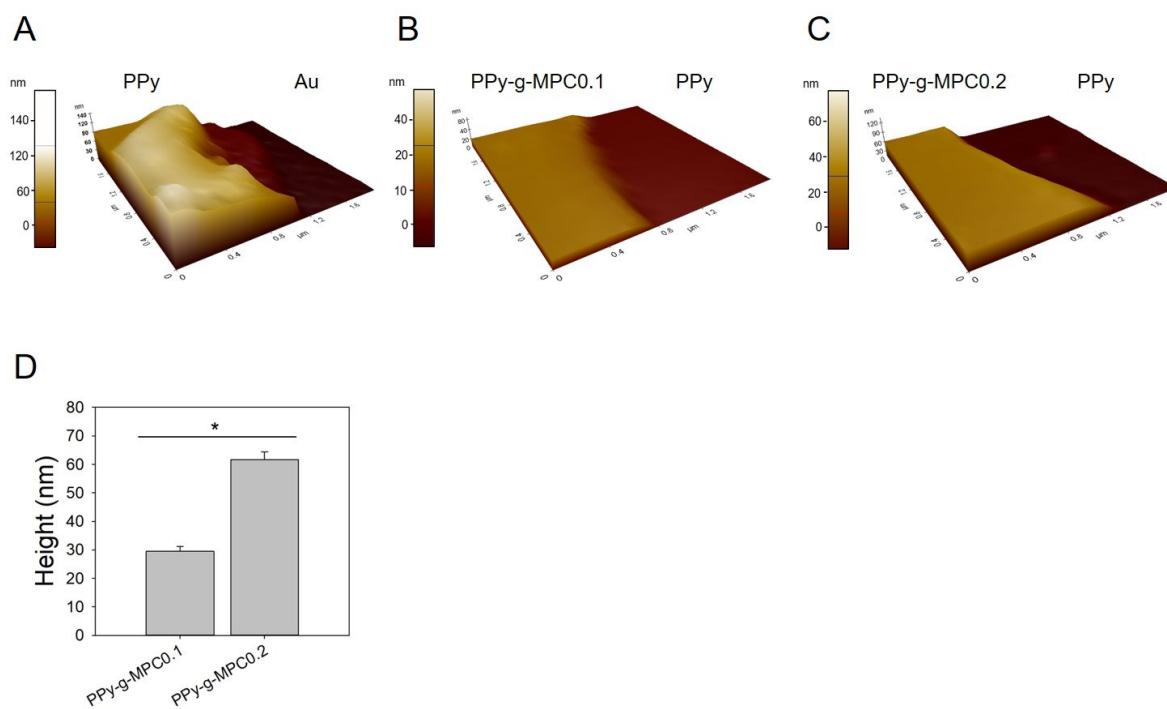

**Figure S1.** (A) AFM images at the interfaces of PPy, PPy-g-MPC0.1, and PPy-g-MPC0.2. (B) Coating thicknesses of MPC layers on PPy electrodes after surface modification.
